# Supplementary material for: Challenges and potentials of new breeding techniques in Cannabis sativa
Source: Front Plant Sci. 2023 Jun 8;14:1154332. doi: 10.3389/fpls.2023.1154332 (PMC10285108; doi:10.3389/fpls.2023.1154332)
Supplement: Supplementary file 2 [file Table_2.xlsx]

## Sheet: Sheet1
Supplementary Table S2
Cannabis sativa transcriptome assemblies
Assembly name	Genbank acc. no.	Isolate	Drug/hemp	Sex	No. of contigs	Sequence technology	Assembly method	Submitter	Reference
Cannbio	GIFP00000000.1	Cannbio-2 Cannbio-male	Medical cannabis with a balanced THC:CBD ratio	Female Male	64413	Illumina HiSeq	SOAPdenovo	Department of Jobs, Precincts & Regions, Bundoora, Vic 3083, Australia	Braich, S., Baillie, R.C., Jewell, L.S., Spangenberg, G.C., and Cogan, N.O. (2019). Generation of a comprehensive transcriptome atlas and transcriptome dynamics in medicinal cannabis. Scientific Reports 9(1), 16583.
Lali(LA)-1	GHVF00000000.1	Tachllta Till (TIL) isolate Lali (LA)	High THCA variety	Female	12	Illumina HiSeq	DRAP Version 1.91	Innovation Center for Biomedical Informatics, Georgetown Medical Center, Washington, DC 20007, USA	McGarvey, P., Huang, J., McCoy, M., Orvis, J., Katsir, Y., Lotringer, N., et al. (2020). De novo assembly and annotation of transcriptomes from two cultivars of Cannabis sativa with different cannabinoid profiles. Gene 762, 145026.
RGM(H2)-1	GHVG00000000.1	Argvana Heart (RGM) isolate Hetech2 (H2)	CBDA plus THCA variety CBD:THC ratio - 1.8:1	Female	12	Illumina HiSeq	DRAP Version 1.91	Innovation Center for Biomedical Informatics, Georgetown Medical Center, Washington, DC 20007, USA	McGarvey, P., Huang, J., McCoy, M., Orvis, J., Katsir, Y., Lotringer, N., et al. (2020). De novo assembly and annotation of transcriptomes from two cultivars of Cannabis sativa with different cannabinoid profiles. Gene 762, 145026.
Cannabis sativa trancriptome assembly	GGIR00000000.1	cv. Santhica 27	Hemp	Monoecious	37074	Illumina MiSeq	CLC NGS Cell Genomics Workbench 9.0.1	Environmental research and innovation, Esch/Alzette 4362, Luxembourg	Behr,M., Lutts,S., Hausman,J.-F., Sergeant,K., Legay,S. and Guerriero,G. De novo transcriptome assembly of textile hemp from datasets on hypocotyls and adult plants. Data Brief 27, 104790 (2019)
canSat3_transcriptome-full	http://genome.ccbr.utoronto.ca/	Purple Kush	15.5% THC	Female	30074	Genome Analyzer IIx Illumina HiSeq	ABySS v1.2.6 and/or Inchworm v03132011	The Cannabis genome project	Van Bakel, H., Stout, J.M., Cote, A.G., Tallon, C.M., Sharpe, A.G., Hughes, T.R., et al. (2011). The draft genome and transcriptome of Cannabis sativa. Genome biology 12(10), 1-18.
finola1_transcriptome-full	http://genome.ccbr.utoronto.ca/	Finola	Hemp - dioecious	Female flowers	37689	Genome Analyzer IIx Illumina HiSeq	ABySS v1.2.6 and/or Inchworm v03132011	The Cannabis genome project	Van Bakel, H., Stout, J.M., Cote, A.G., Tallon, C.M., Sharpe, A.G., Hughes, T.R., et al. (2011). The draft genome and transcriptome of Cannabis sativa. Genome biology 12(10), 1-18.
