# Supplementary material for: Challenges and potentials of new breeding techniques in Cannabis sativa
Source: Front Plant Sci. 2023 Jun 8;14:1154332. doi: 10.3389/fpls.2023.1154332 (PMC10285108; doi:10.3389/fpls.2023.1154332)
Supplement: Supplementary file 3 [file Table_3.xlsx]

## Sheet: Sheet1
Supplementary Table S3
Cannabis sativa plastid genomes
N.A. = not available
Plastid reference genomes
Name	Genbank acc. no.	Isolate	Drug/hemp	Plastid	Size, bp	Submitter	Reference
Cannabis sativa chloroplast reference genome	NC_027223/KR363961	Yoruba Nigeria	15-20% THC	Chloroplast	153854	NCBI Genome Project / Biological Sciences, Inha University, Incheon, South Korea	Oh, H., Seo, B., Lee, S., Ahn, D.-H., Jo, E., Park, J.-K., et al. (2016). Two complete chloroplast genome sequences of Cannabis sativa varieties. Mitochondrial Dna Part A 27(4), 2835-2837.
Cannabis sativa mitochondrion, complete genome	NC_029855/KU310670	CBDRx-18	High-CBD Cannabis	Mitochodrion	415602	NCBI RefSeq Genome Project; Ecology and Evolutionary Biology, University of Colorado, Boulder, USA	Van Bakel, H., Stout, J.M., Cote, A.G., Tallon, C.M., Sharpe, A.G., Hughes, T.R., et al. (2011). The draft genome and transcriptome of Cannabis sativa. Genome biology 12(10), 1-18.
Plastid genomes
Chloroplast
Name	Genbank acc. no.	Isolate	Drug/hemp	Plastid	Size, bp	Submitter	Reference
Cannabis sativa subsp. sativa cultivar Cheungsam chloroplast, complete genome	KR184827	Cheungsam	Hemp	Chloroplast	153848	Biological Sciences, Inha University, Incheon, South Korea	Oh, H., Seo, B., Lee, S., Ahn, D.-H., Jo, E., Park, J.-K., et al. (2016). Two complete chloroplast genome sequences of Cannabis sativa varieties. Mitochondrial Dna Part A 27(4), 2835-2837.
Cannabis sativa cultivar Carmagnola chloroplast, complete genome	NC_026562/KP274871	Carmagnola	Hemp THC: 0.2 - 0.3% CBD: 9 - 15%	Chloroplast	153871	Ecology and Evolutionary Biology, University of Colorado, Boulder, USA
Cannabis sativa cultivar dagestani chloroplast, complete genome	KR779995	Dagestani	Hemp	Chloroplast	153867	NCBI RefSeq Genome Project / Ecology and Evolutionary Biology, University of Colorado, Boulder, USA	Vergara, D., White, K.H., Keepers, K.G., and Kane, N.C. (2016). The complete chloroplast genomes of Cannabis sativa and Humulus lupulus. Mitochondrial Dna Part A 27(5), 3793-3794.
Cannabis sativa chloroplast, complete genome	KY084475	Chinese hemp	Hemp	Chloroplast	153945	Ecology and Evolutionary Biology, University of Colorado, Boulder, USA
Cannabis sativa chloroplast, complete genome	OK523376	N.A.	N.A.	Chloroplast	153927	The Institute of Medicinal Plant Development, Chinese Academy of Medical Sciences, Beijing, China
Cannabis sativa isolate H1 chloroplast, complete genome	MT742550	H1	N.A.	Chloroplast	153894	Wuhan Botanical Garden, Chinese Academy of Sciences, Hubei China
Cannabis sativa isolate D1 chloroplast, complete genome	MT742549	D1	N.A.	Chloroplast	153867	Wuhan Botanical Garden, Chinese Academy of Sciences, Hubei China
Cannabis sativa isolate 8_BDS chloroplast, complete genome	MT742548	8_BDS	N.A.	Chloroplast	153857	Wuhan Botanical Garden, Chinese Academy of Sciences, Hubei China
Cannabis sativa chloroplast, complete genome	MT740316	N.A.	N.A.	Chloroplast	153867	Wuhan Botanical Garden, Chinese Academy of Sciences, Hubei China
Cannabis sativa cultivar Longma 9 chloroplast, complete genome	OM479429	Longma 9	N.A.	Chloroplast	153849	College of Sport Human Sciences, Harbin, Sport University, Heilongjiang, China
Cannabis sativa chloroplast, complete genome	MT721158	N.A.	N.A.	Chloroplast	153873	Chinese Academy of Tropical Agricultural Sciences, HaiKou, China
Cannabis sativa cultivar Yunma 8 chloroplast, complete genome	OK558823	Yunma 8	N.A.	Chloroplast	153915	Environment and Plant Protection Institute, Chinese Academy of Tropical Agricultural Sciences, Hainan, China
Cannabis sativa cultivar Yunma 7 chloroplast, complete genome	MW013540	Yunma 7	Hemp	Chloroplast	153899	School of Agriculture, Yunnan University, Yunnan, China	Deng, G., Yang, M., Zhao, K., Yang, Y., Huang, X., and Cheng, X. (2021). The complete chloroplast genome of Cannabis sativa variety Yunma 7. Mitochondrial DNA Part B 6(2), 531-532.
Cannabis sativa chloroplast, complete genome	MH118118	N.A.	Hemp	Chloroplast	153910	Plant Germplasm and Genomics Center, Germplasm Bank of Wild Species, Kunming Institute of Botany, Yunnan, China	Zhang, H., Jin, J., Moore, M.J., Yi, T., and Li, D. (2018). Plastome characteristics of Cannabaceae. Plant diversity 40(3), 127-137.
Mitochondrion
Name	Genbank acc. no.	Isolate	Drug/hemp	Plastid	Size, bp	Submitter	Reference
Cannabis sativa mitochondrion, complete genome	OK523375	N.A.	N.A.	Mitochodrion	405552	The Institute of Medicinal Plant Development, Chinese Academy of Medical Sciences, Beijing, China
Cannabis sativa cultivar Carmagnola mitochondrion, complete genome	KR059940	Carmagnola	THC: 0.2 - 0.3% CBD: 9 - 15%	Mitochodrion	414545	Ecology and Evolutionary Biology, University of Colorado, Boulder, USA	White, K.H., Vergara, D., Keepers, K.G., and Kane, N.C. (2016). The complete mitochondrial genome for Cannabis sativa. Mitochondrial Dna Part B 1(1), 715-716.
Cannabis sativa isolate Euro-Oil mitochondrion, complete genome	MT557709	Euro-Oil	Hemp	Mitochodrion	416019	EBIO, Colorado University, Boulder, USA	Attia, Z., Pogoda, C., Vergara, D., and Kane, N.C. (2022). Mitochondrial genomes do not appear to regulate flowering pattern/reproductive strategy in Cannabis sativa. AoB PLANTS 14(3), plab068.
Cannabis sativa cultivar Sievers Infinity mitochondrion, complete genome	KU363807	Sievers	Hemp	Mitochodrion	414545	Ecology and Evolutionary Biology, University of Colorado, Boulder, USA
Cannabis sativa mitochondrion, complete genome	ON930432	N.A.	N.A.	Mitochodrion	415837	Center for Bioinformatics, Institute of Medicinal Plant Development, Beijing, China
Cannabis sativa mitochondrion, complete genome	OM974713	N.A.	N.A.	Mitochodrion	415798	Harbin Institute Of Physical Education, Heilongjiang, China
Cannabis sativa mitochondrion, complete genome	MT361980	Kompolti	Hemp	Mitochodrion	415806	EBIO, Colorado University, Boulder, USA	Attia, Z., Pogoda, C., Vergara, D., and Kane, N.C. (2022). Mitochondrial genomes do not appear to regulate flowering pattern/reproductive strategy in Cannabis sativa. AoB PLANTS 14(3), plab068.
Cannabis sativa mitochondrion, complete genome	MN599027	N.A.	N.A.	Mitochodrion	415667	EBIO, Colorado University, Boulder, USA
