# Supplementary material for: Challenges and potentials of new breeding techniques in Cannabis sativa
Source: Frontiers journal article supplement (doi:10.3389/fpls.2023.1154332), 2023-06-08
Supplement: Table_1.xlsx [file Table_1.xlsx]

## Sheet: Sheet1
Supplementary Table S1
Cannabis sativa genomes
Reference genome
Name	Genbank acc. no.	Isolate	Drug/hemp	Sex	Assembly level	Genome size, Mb	Submitter	Reference
cs10	GCA_900626175.2/GCF_900626175.2	CBDRx-18	High-CBD Cannabis	Female	Chromosome	875.7	HARVARD OEB	Grassa, C.J., Weiblen, G.D., Wenger, J.P., Dabney, C., Poplawski, S.G., Timothy Motley, S., et al. (2021). A new Cannabis genome assembly associates elevated cannabidiol (CBD) with hemp introgressed into marijuana. New Phytologist 230, 1665-1679. doi: 10.1111/nph.17243
Other genome assemblies
Name	Genbank acc. no.	Isolate	Drug/hemp	Sex	Assembly level	Genome size, Mb	Submitter	Reference
ASM23057v5	GCA_000230575.5	Purple Kush	15.5% THC	Female	Chromosome	892	University of Toronto, Banting and Best Department of Medical Research	Laverty, K.U., Stout, J.M., Sullivan, M.J., Shah, H., Gill, N., Holbrook, L., et al. (2019). A physical and genetic map of Cannabis sativa identifies extensive rearrangements at the THC/CBD acid synthase loci. Genome research 29(1), 146-156. Van Bakel, H., Stout, J.M., Cote, A.G., Tallon, C.M., Sharpe, A.G., Hughes, T.R., et al. (2011). The draft genome and transcriptome of Cannabis sativa. Genom…
Chemdog91_175268	GCA_001509995.1	Chemdog91	THC 25.8% CBD 0%	Female	Scaffold	285.9	Courtage Life Sciences
ASM186575v1	GCA_001865755.1	Cannatonic	5.5% THC, 10% CBD	Female	Contig	585.8	Phylos Bioscience
ASM209043v1	GCA_002090435.1	Pineapple Banana Bubba Kush	Drug	Male	Contig	512.2	Steep Hill Genetics / U. Colorado Cannabis Genomic Research Initiative
ASM341772v2	GCA_003417725.2	Finola	Hemp - dioecious	N.A.	Chromosome	1010	University of Toronto	Laverty, K.U., Stout, J.M., Sullivan, M.J., Shah, H., Gill, N., Holbrook, L., et al. (2019). A physical and genetic map of Cannabis sativa identifies extensive rearrangements at the THC/CBD acid synthase loci. Genome research 29(1), 146-156. Van Bakel, H., Stout, J.M., Cote, A.G., Tallon, C.M., Sharpe, A.G., Hughes, T.R., et al. (2011). The draft genome and transcriptome of Cannabis sativa. Genom…
Oct15_3.7Mb_N50_Jamaican_Lion_Assembly	GCA_003660325.2	Jamaican Lion DASH	Type II – a mixed ratio profile with CBD and THC in varying moderate concentrations	Female	Contig	1074	The DASH DAO
JL_Mother	GCA_012923435.1	Jamaican Lion ^4 sibling to JL_Farther	High CBD strain	Female	Contig	876.6	Medicinal Genomics
JL_Father	GCA_013030025.1	Jamaican Lion ^4 sibling to JL_Mother	High CBD strain	Male	Contig	1009	Medicinal Genomics
ASM1303036v1	GCA_013030365.1	Wildtype "JL"	N.A.	Female	Chromosome	812.5	Ministry of Public Security	Gao, S., Wang, B., Xie, S., Xu, X., Zhang, J., Pei, L., et al. (2020). A high-quality reference genome of wild Cannabis sativa. Horticulture research 7.
Cannbio-2	GCA_016165845.1	Cannbio-2	Medical cannabis with a balanced THC:CBD ratio	Female	Chromosome	914.4	DJPR	Braich, S., Baillie, R.C., Spangenberg, G.C., and Cogan, N.O. (2020). A new and improved genome sequence of Cannabis sativa. BioRxiv.
JL5	GCA_016415525.1	Jamaican Lion ^4 offspring of JL_Mother and JL_Father	High CBD strain	Female	Contig	999.1	Medicinal Genomics
Csat_AbacusV2	GCA_025232715.1	Abacus	High CBD strain	Female	Chromosome	796.6	Phylos Bioscience, Inc.
ASM151000v1	GCA_001510005.1	LA Confidential	High THC strain	Female	Contig	595.4	Courtage Life Sciences
